## **LuftiBus in the school (LUIS): a population-based study on respiratory health in schoolchildren.**

Rebeca Mozun<sup>\*1,2</sup>, Claudia E. Kuehni<sup>\*1,3</sup>, Eva S. L. Pedersen<sup>1</sup>, Myrofora Goutaki<sup>1,3</sup>,  
Johanna M. Kurz<sup>3</sup>, Kees de Hoogh<sup>4,5</sup>, Jakob Usemann<sup>6,7</sup>, Florian Singer<sup>3,8</sup>, Philipp  
Latzin<sup>#3</sup>, Alexander Moeller<sup>#6</sup>

\*These authors contributed equally to the work

#These authors contributed equally to the work

<sup>1</sup>Institute of Social and Preventive Medicine, University of Bern, Switzerland

<sup>2</sup>Graduate School for Cellular and Biomedical Sciences, University of Bern, Switzerland

<sup>3</sup>Paediatric Respiratory Medicine, Children's University Hospital of Bern, University of Bern, Switzerland

<sup>4</sup>Swiss Tropical and Public Health Institute, Basel, Switzerland

<sup>5</sup>University of Basel, Basel, Switzerland

<sup>6</sup>Division of Respiratory Medicine, University Children's Hospital Zurich and Children's Research Center, University of Zurich, Switzerland

<sup>7</sup>University Children's Hospital Basel (UKBB), Basel, Switzerland

<sup>8</sup>PEDNET, paediatric clinical trial unit, Children's University Hospital of Bern, University of Bern, Switzerland

### **Corresponding author:**

Prof. Alexander Moeller, MD

University Children's Hospital Zurich – Eleonorenstiftung

Steinwiesstrasse 75, CH-8032 Zurich, Switzerland

Tel.: +41 44 266 72 03

Email: [alexander.moeller@kispi.uzh.ch](mailto:alexander.moeller@kispi.uzh.ch)

**Take home message:** *LuftiBus in the school* (LUIS) is a population-based study with detailed lung function data and rich information on respiratory health in Swiss schoolchildren.

## Abstract

Respiratory disease is common in children and strongly associated with lifestyle and environmental exposures. Thus, it is important to study the epidemiology locally.

*LuftiBus in the school* (LUIS) was set up to assess the respiratory health of schoolchildren in the canton of Zurich, Switzerland.

LUIS is a cross-sectional population-based study that was carried-out 2013 to 2016.

Children aged 6-17 years living in the canton of Zurich were eligible to participate. All

schools in the canton were approached and the school head decided whether the

school would participate and with which classes. Consenting parents answered a

standardized questionnaire at home and assenting children completed a shorter

questionnaire by interview at school. Trained technicians measured children's lung

function including spirometry, double tracer gas single-breath washout (DTG-SBW) and

fractional exhaled nitric oxide (FeNO). Address histories of participants were geocoded

and can be linked with area-based socioeconomic measures and environmental

exposures including spatiotemporal air pollution estimates for specific time periods

and locations. A subgroup was seen again 12 months later using the same procedures

to collect longitudinal data.

The study included 3879 children at baseline and 646 at the one-year follow-up.

Median age was 12.7 years; 281 (8%) had wheezed in the past year. At baseline we

collected 3466 (89%) parental and 3555 (92%) children's questionnaires, and 3402

(88%) FeNO, 3478 (90%) spirometry, and 2251 (58%) DTG-SBW measurements.

LUIS is a rich resource of health-related data, with information on lung function, environmental exposures and respiratory health on Swiss schoolchildren.

## Introduction

Respiratory disease is common, and can affect quality of life and school performance in children [1]. Symptoms and diseases result from complex interactions between genetic factors and modifiable behavioural and environmental influences such as physical activity, passive and active smoking and air pollution [2]. The prevalence of respiratory symptoms such as wheeze and cough varies widely between countries, so local studies are important [3, 4]. Geographic differences in prevalence of respiratory diseases may result from differences in lifestyle, health care, socioeconomic factors, and environmental exposures [5].

Previous research on the respiratory health of Swiss children focused on lower respiratory symptoms and farming environment [6-12]. There are no recent studies and none that includes detailed lung function testing. Different lung function tests measure diverse aspects of lung physiology. Joint evaluation of different tests' results is useful to understand the underlying mechanisms that cause respiratory symptoms in children. The objectives of LUIS are to assess frequency and risk factors of respiratory symptoms and diagnoses and to study associations between symptoms, different lung function assessments and environmental exposures. This article explains the methodology of LUIS and presents first results.

## Methods

### Study design and setting

Throughout the manuscript we use past tense for procedures or analyses that were done in the past and use present or future tense for those that are underway or planned. LUIS is a cross-sectional study was conducted from November 2013 to December 2016 among schoolchildren aged 6 to 17 years living in the canton of Zurich (ClinicalTrials.gov: NCT03659838). A subsample of children was seen again one year later for collection of longitudinal data. The canton of Zurich is located in the north-eastern part of Switzerland and is the most populated canton in the country with over 1.5 million inhabitants, an 18% of the Swiss population [13].

### Study procedures

LUIS was embedded in a respiratory health promotion activity offered by *Lunge Zürich* [14-16]. *Lunge Zürich* is a non-profit organization that promotes respiratory health prevention and research [14]. LUIS used a special bus from *Lunge Zürich*, the *LuftiBus*, to visit schools within the canton of Zurich, further details on the *LuftiBus* are described in the online material [14]. Schools contributed 500CHF for a two-day visit and 800CHF for a visit lasting one week, from their reserved budget for health prevention activities in schools. All school heads in the canton of Zurich were invited to participate (Figure 1). They decided whether to take part in the project, and with which classes. The study coordinator provided the schools with closed envelopes containing study information for parents and for children, an informed consent form and a questionnaire for parents. Teachers gave these envelopes to the students two weeks before the visit. Parents were asked to complete the questionnaire. Two study

field workers, who were trained lung function technicians, visited each school for a median of three days with the study bus, the *LuftiBus* [14]. They collected the parental questionnaires and consent forms from the teachers and asked all students for oral and where appropriate written consent. The study bus contained computers and equipment for lung function testing. One field worker measured the children's height and weight and performed the lung function tests, while the other interviewed the children using a short electronic questionnaire.

Where the heads of the participating schools agreed, the school was visited again one year later (2015-2016) following the same procedures and performing the same tests as in the baseline visit.

## Data collection

### *The questionnaires*

The study used two questionnaires: one for parents and one for children. Both included questions on respiratory symptoms and diagnoses including the key questions from the International Study on Asthma and Allergies in Childhood study and additional questions from the Leicester Respiratory Cohort questionnaires [3, 17]. The questionnaire to parents included questions about frequency, duration, severity, and triggers of upper and lower respiratory symptoms, doctors' diagnosis of asthma, medication, environmental factors, household characteristics, family history of asthma, and current and past addresses (Table 1). We geocoded participant's addresses using a reference file from the Swiss Federal Statistical Office (Neuchâtel) [13]. The data from the parental questionnaire was entered into an Epidata database

(version 4.2.0.0, EpiData Association, Denmark) at the Institute for Social and Preventive Medicine (ISPM) in Bern.

Children replied to the questionnaire via interview by the field workers in the bus. It included questions about current respiratory health such as rhinitis, cough and wheeze, the presence of cough or a cold on the day of the school visit, inhaled or oral asthma medication on the day of the visit, active smoking, and parental smoking. To help the children correctly report asthma medications, the field workers used a poster with pictures and commercial names of all commonly used inhaled and oral medications in Switzerland (online Figure S1). Children's answers were directly entered by field workers into the web-based Research Electronic Data Capture (REDCap) database [18].

#### *Area-based index of socioeconomic position in Switzerland (Swiss-SEP)*

The Swiss-SEP has been developed by the Swiss National Cohort (SNC) as an area-based measure of socioeconomic status that incorporates information on rent per square meter, education and occupation of households' heads, and number of persons per household room [19, 20]. The Swiss-SEP ranges from 0 (lowest) to 100 (highest). We estimated the Swiss-SEP for our participants by matching the geocodes of our participants addresses to the nearest geocode in the Swiss-SEP dataset. If the address of a participant was missing, we assigned the median Swiss-SEP among participants of the same school. In this manuscript we used a dataset from the SNC to assess the distribution of Swiss-SEP among households from the canton of Zurich with at least one child in school-age (6-17 years) and compared it to the distribution of Swiss-SEP of our study participants.

### *Lung function measurements*

Children's standing height and weight were measured without shoes and recorded in the spirometry database. Lung function tests were performed to children inside the bus in the following order: 1) double tracer gas single-breath washout (DTG-SBW), 2) fractional exhaled nitric oxide (FeNO), and 3) spirometry.

#### *DTG-SBW*

DTG-SBW was performed using a validated and commercially available setup (Exhalyzer D<sup>®</sup>, Eco Medics AG, Duernten, Switzerland) [21]. The patient interface consisted of a bacterial filter and a snorkel mouthpiece to prevent air leaks near the mouth. According to current paediatric equipment recommendations, a dead space reducer and a disposable hygienic insert provided by the manufacturer were used [22]. The DTG mixture contained 26.3% helium (He), 5% sulphur hexafluoride (SF<sub>6</sub>), 21% oxygen (O<sub>2</sub>), and balance dinitrogen (N<sub>2</sub>) from pressurized cylinders (Carbagas, Bern, Switzerland). Children were watching a video for distraction while breathing through an open bypass system. Directly before tracer gas wash-in, the apparatus dead space and the bias flow was flushed with double-tracer gas or 100% O<sub>2</sub> during expiration to prevent re-inspiration of expired or ambient gas [23]. DTG-SBW was performed in accordance to the European Respiratory Society (ERS) consensus on inert gas washout testing [22]: after establishing natural tidal breathing for at least 5 breaths monitored by online flow-volume loops and tidal volumes varying less than 10%, the system was flushed with the DTG mixture. Within only one breath, the children inhaled the double-tracer gas and exhaled it back. SBW tests were done in triplicate. After each test, at least 10 breaths at room air followed until the online monitoring of the gas signals

returned to baseline [22]. Primary outcome of the DTG-SBW was the mean slope from the tidal (alveolar) phase III from three technically acceptable DTG-SBW curves, normalized for tidal volume ( $S_{nIII}$ ) [24]. The magnitude of phase III slopes from He and SF6 relates to acinar branching asymmetry and small airways obstruction [25]. DTG-SBW is a fast and easy to perform test with low variability and high repeatability [21].

### *FeNO*

FeNO was measured with a single breath on-line method according to recommendations [26]. We used a fast response chemiluminescence analyser CLD 88, Eco Medics AG, Duernten, Switzerland. The field workers calibrated the FeNO device every morning and the gas was calibrated once per month. Children breathed air free of nitric oxide via the Denox system (EcoMedics, Dürnten). This setup also included a bacterial filter and disposable hygienic mouthpiece. After ten breaths, children exhaled against an adjusted expiratory resistance with a constant target flow of 50ml/sec for at least at least 4 seconds for children younger than 12 years and 6 seconds for children aged 12 years or older. We aimed for at least two reproducible exhalations with the nitric oxide plateau values within 10% of each other. Results were stored digitally, including information on FeNO (parts per billion, ppb), expiratory time (seconds), duration of the plateau (seconds), and average flow in the plateau (ml/s). The primary outcome was FeNO.

### *Spirometry*

Spirometry was performed using Masterlab, Jaeger, Würzburg, Germany according to American Thoracic Society (ATS) / ERS recommendations [27]. The children performed 3 to 5 forced expiratory manoeuvres. Spirometry parameters were recorded and stored digitally using the Sentry Suite software, Carefusion, Hoechberg Germany.



Spirometry parameters included forced vital capacity (FVC), forced expiratory volume in the first second (FEV1), peak expiratory flow (PEF), FEV1/FVC ratio, maximum expiratory flow at 75%, 50% and at 25% FVC (FEF75, FEF50, FEF25) and between the 25 and 75% of FVC (FEF25–75). The spirometry flow-volume curve of the best effort was printed on paper. Primary outcomes were forced expiratory flows and volumes. Absolute values of spirometry parameters were expressed as z-scores according to Global Lung Initiative reference values [28].

### *Air pollution assessment*

Spatiotemporal data on nitrogen dioxide (NO<sub>2</sub>) and particulate matter with an aerodynamic diameter of 2.5µm or less (PM<sub>2.5</sub>) will be obtained from models developed by de Hoogh et al. [29, 30]. Daily average NO<sub>2</sub> concentrations were modelled across Switzerland using a multistage framework with mixed-effect and random forest models at a fine spatial resolution of 100x100m [29] combining the Ozone Monitoring Instrument (OMI) NO<sub>2</sub> product with Copernicus Atmosphere Monitoring Service (CAMS), land use and meteorological variables. Daily PM<sub>2.5</sub> concentrations across Switzerland were estimated first by a combination of a mixed effect model and a generalised additive mixed model at a 1x1km resolution using Multiangle Implementation of Atmospheric Correction (MAIAC), spectral aerosol optical depth (AOD) data, and second by support vector machine algorithms used to predict precise exposure estimates at a 100x100m resolution using with spatiotemporal predictor data [30]. These air pollution models allow to estimate participants' average exposure to NO<sub>2</sub> and PM<sub>2.5</sub> for specific time windows and

locations. We will link the geocoded residential and school addresses of study participants to NO<sub>2</sub> and PM<sub>2.5</sub> data by GIS (geographic information system) overlay.

**Table 1:** Details of data collected in the *LuftiBus in the school study* (LUIs).

| Data sources                         | Collected data                                                                                                                                                                                                                                                                                                                                                                                                                                                                                                                                                                                                                                                                                                                                                                                                                                                                                                                                                                                                                                       |
|--------------------------------------|------------------------------------------------------------------------------------------------------------------------------------------------------------------------------------------------------------------------------------------------------------------------------------------------------------------------------------------------------------------------------------------------------------------------------------------------------------------------------------------------------------------------------------------------------------------------------------------------------------------------------------------------------------------------------------------------------------------------------------------------------------------------------------------------------------------------------------------------------------------------------------------------------------------------------------------------------------------------------------------------------------------------------------------------------|
| <b>1. Questionnaires</b>             |                                                                                                                                                                                                                                                                                                                                                                                                                                                                                                                                                                                                                                                                                                                                                                                                                                                                                                                                                                                                                                                      |
| <i>For parents</i>                   | <ul style="list-style-type: none"> <li>Upper and lower respiratory symptoms in the past 12 months: colds, rhinitis, snoring, cough, wheeze, frequency of wheeze/asthma attacks, triggers of cough and wheeze [3, 17]</li> <li>Asthma diagnosis and hay fever [3, 17]</li> <li>Management of wheeze / asthma in the past 12 months: number of doctor visits; medication use including short and long acting beta 2 agonists, inhaled corticosteroids, leukotriene receptor antagonists, and antihistaminics</li> <li>Household: Current and past address, living on which floor, type of cooking stove, presence of oven or chimney, living on a farm</li> <li>Environment and lifestyle: paternal and maternal smoking indoors or outdoors and number of cigarettes smoked, physical activity of the child, type of commuting to school, sports outside school, pets at home</li> <li>Family: country of birth of the child, country of origin of the parents, siblings, parental education, parental history of asthma and chronic cough</li> </ul> |
| <i>For children</i>                  | <ul style="list-style-type: none"> <li>Currently having a cold; currently coughing</li> <li>Upper and lower respiratory symptoms in the past 12 months: colds, rhinitis, waking up with a dry mouth as a proxy for mouth breathing, cough, wheeze, triggers of cough and wheeze [3, 17]</li> <li>Asthma diagnosis and hay fever [3, 17]</li> <li>Medication during the day of the visit: inhaled short and long acting beta 2 agonists, inhaled corticosteroids, leukotriene receptor antagonists</li> <li>Environment and lifestyle: frequency of active smoking of cigarettes, shishas and e-cigarettes; paternal and maternal smoking</li> </ul>                                                                                                                                                                                                                                                                                                                                                                                                  |
| <b>2. Anthropometrics</b>            | <ul style="list-style-type: none"> <li>Height and weight measured in the bus without wearing shoes</li> <li>Body mass index z-scores calculated using reference tables for the Swiss population [31]</li> </ul>                                                                                                                                                                                                                                                                                                                                                                                                                                                                                                                                                                                                                                                                                                                                                                                                                                      |
| <b>3. Lung function measurements</b> |                                                                                                                                                                                                                                                                                                                                                                                                                                                                                                                                                                                                                                                                                                                                                                                                                                                                                                                                                                                                                                                      |
| <i>Spirometry</i>                    | <ul style="list-style-type: none"> <li>Masterlab, Jaeger, Würzburg, Germany. Mouthpiece, filter, nasal clamp</li> <li>Main outcomes: forced expiratory flows and volumes [27]</li> </ul>                                                                                                                                                                                                                                                                                                                                                                                                                                                                                                                                                                                                                                                                                                                                                                                                                                                             |
| <i>FeNO</i>                          | <ul style="list-style-type: none"> <li>Fast response chemiluminescence analyzer CLD 88, Eco Medics AG, Duernten, Switzerland. Mouthpiece, filter, no nasal clamp</li> <li>Main outcome: mean FeNO (ppb) [26, 32]</li> </ul>                                                                                                                                                                                                                                                                                                                                                                                                                                                                                                                                                                                                                                                                                                                                                                                                                          |
| <i>DTG-SBW (He, SF6)</i>             | <ul style="list-style-type: none"> <li>Exhalyzer D, Eco Medics AG, Duernten, Switzerland. Mouthpiece, filter, nasal clamp [22]</li> <li>Main outcome: phase III slope</li> </ul>                                                                                                                                                                                                                                                                                                                                                                                                                                                                                                                                                                                                                                                                                                                                                                                                                                                                     |
| <b>4. Air pollution</b>              | <ul style="list-style-type: none"> <li>We will use data from air pollution models developed by de Hoogh et al. [29, 30] to estimate participants' average exposure to NO<sub>2</sub> and PM<sub>2.5</sub> for specific time windows and locations, based on participants' exact address history.</li> </ul>                                                                                                                                                                                                                                                                                                                                                                                                                                                                                                                                                                                                                                                                                                                                          |
| <b>5. Swiss-SEP</b>                  | <ul style="list-style-type: none"> <li>An area-based measure of socioeconomic status based on data about rent per square meter, education and occupation of households' heads, and household crowding, which ranges from 0 (lowest) to 100 (highest), developed as part of the Swiss National Cohort study [19, 20]</li> </ul>                                                                                                                                                                                                                                                                                                                                                                                                                                                                                                                                                                                                                                                                                                                       |

FeNO: Fractional exhaled nitric oxide. ppb: parts per billion. DTG-SBW: double tracer gas single breath washout. He: helium. SF<sub>6</sub>: sulphur hexafluoride. NO<sub>2</sub>: nitrogen dioxide. PM<sub>2.5</sub>: particulate matter of aerodynamic diameter of 2.5µm or less.

## Ethics and data safety

The ethics committee of the canton of Zurich approved the study (KEK-ZH-Nr: 2014-0491). Parents signed the informed consent and completed a detailed questionnaire. Children assented orally and those aged 15 years or older did also sign. Participant identifiable information was stored in a separate database and only pseudoanonymized datasets are used for analysis. Paper-based data were securely locked at ISPM and only accessible to the study team. Raw data of DTG-SBW, FeNO and spirometry measurements were stored in a safe study server during recruitment and were thereafter encrypted and securely stored in the ISPM protected server. Access to the server and the study databases is restricted to members of the study team. Study datasets are securely stored and routinely backed-up in protected servers of ISPM Bern. Study collaborators and other researchers can obtain datasets for analysis if a detailed concept sheet is presented for the planned analyses and approved by the principal investigators (AM, PL and CK).

## Data preparation and analysis

We calculated body mass index (BMI) z-scores according to Swiss population references [31]. We categorised BMI z-scores  $\geq 2$  as obesity,  $\geq 1$  to  $< 2$  as overweight and  $\leq -2$  as underweight, according to the WHO classification [33]. In this manuscript we compared participants' characteristics between age groups using P values for a trend. We used the software STATA (Version 16.1, StataCorp., College Station, TX) for statistical analysis. Confounders will be selected a priori in our planned analyses based on Directed Acyclic Graphs (DAGs). Details on data quality assessments are in the

online material. Results from DTG-SBW, FeNO or spirometry tests which did not meet the quality standards described in the online material will not be included in analyses. We will adhere to STROBE reporting guidelines in manuscripts using LUIS datasets [34].

## Results

### Participating schools

All 490 schools in the canton of Zurich were invited to participate (online Table S1). At baseline 37 schools took part and 3879 participants consented. One year later, 19 schools were visited a second time and 646 children were followed-up. The canton of Zurich (Figure 2) has mostly schools in small (47%) and large urban areas (41%) and fewer in rural areas (12%) (Figure 3, online Table S1) [35, 36]. At baseline, LUIS visited 18 schools in small (49%) and 15 in large (41%) urban areas and 4 in rural areas (11%), 13 schools in small (68%) and 4 in large (21%) urban areas and 2 in rural areas (11%) were revisited. Median Swiss-SEP was 66.2 (interquartile range, IQR: 58.2-73.0) for households with at least one school-aged child in the canton of Zurich and 69.3 (IQR: 61.4-76.3) for LUIS participants at baseline and 69.4 (IQR: 64.6-74.8) at follow-up (Figure 4, Figure S2).

### Completeness of datasets

At baseline 3466 participants provided parental questionnaires, 3555 answered the children's questionnaire, 3455 did spirometry and 3402 FeNO tests (Table 2). Data from all four datasets is available for 2655 at baseline and 526 at follow-up. DTG-SBW data is available for 2251 children at baseline and 461 at follow-up.

**Table 2: LuftiBus in the school study (LUIS):** Numbers of participants with available information on parental questionnaires (PQ), children questionnaires (CQ), spirometry (Spiro), and fractional exhaled nitric oxide (FeNO) at baseline and at the one-year follow-up.

| Available data         | Baseline<br>N | Follow-up<br>N |
|------------------------|---------------|----------------|
| PQ                     | 3466          | 620            |
| CQ                     | 3555          | 631            |
| Spiro                  | 3455          | 605            |
| FeNO                   | 3402          | 579            |
| PQ & CQ                | 3180          | 605            |
| PQ & Spiro             | 3080          | 580            |
| PQ & FeNO              | 3039          | 556            |
| CQ & Spiro             | 3239          | 601            |
| CQ & FeNO              | 3192          | 575            |
| Spiro & FeNO           | 3174          | 552            |
| CQ & Spiro & FeNO      | 2973          | 548            |
| PQ & Spiro & FeNO      | 2833          | 530            |
| PQ & CQ & FeNO         | 2854          | 552            |
| PQ & CQ & Spiro        | 2981          | 576            |
| PQ & CQ & Spiro & FeNO | 2655          | 526            |

Number of spirometry and FeNO measurements describe measurements before quality control.

### Characteristics of the study population

LUIS included 989 children aged 6-9 years (25%), 1728 aged 10-13 years (45%) and 1162 aged 14-17 years (30%) at baseline (Table 3). Current wheeze was reported by parents of 281 (8%) children. Exercise induced wheeze was more common among older children, and night cough among younger children. Use of inhaled short acting beta two agonists (SABA) and inhaled corticosteroid (ICS) in the past year was reported by parents of 257 (8%) and 179 (5%) children respectively. Parents of 1110 (32%) reported that their child was very physically activity level. This was more common for younger children. Mothers of 575 (17%) and fathers of 761 (22%) children reported to smoke. BMI z-score was between 1 and 2 z-scores in 575 of the children (18%) and  $\geq 2$  in 191 (6%), more older than younger children were obese.

**Table 3: *LuftiBus* in the school study (LUIS): Characteristics of the study participants.**

|                                       | Total<br>N=3879 | Age groups (years) |                    |                    | P trend |
|---------------------------------------|-----------------|--------------------|--------------------|--------------------|---------|
|                                       |                 | 6 to 9<br>N=989    | 10 to 13<br>N=1728 | 14 to 17<br>N=1162 |         |
| Male sex                              | 1941 (50%)      | 511 (52%)          | 843 (49%)          | 587 (51%)          | -       |
| Age in years, mean (SD)               | 12.1 (2.7)      | 8.2 (1.0)          | 12.4 (1.2)         | 15.0 (0.7)         | -       |
| Body mass index (BMI)                 |                 |                    |                    |                    |         |
| Underweight (BMI z-score ≤ -2)        | 137 (4%)        | 34 (4%)            | 74 (5%)            | 29 (3%)            | 0.005   |
| Normal weight (BMI z-score > -2, < 1) | 2309 (72%)      | 599 (76%)          | 1003 (70%)         | 707 (72%)          |         |
| Overweight (BMI z-score ≥ 1, < 2)     | 575 (18%)       | 124 (16%)          | 276 (19%)          | 175 (18%)          |         |
| Obese (BMI z-score ≥ 2)               | 191 (6%)        | 33 (4%)            | 90 (6%)            | 68 (7%)            |         |
| Level of physical activity            |                 |                    |                    |                    |         |
| Low                                   | 334 (10%)       | 26 (3%)            | 142 (9%)           | 166 (18%)          | <0.001  |
| Moderate                              | 1981 (58%)      | 484 (51%)          | 931 (60%)          | 566 (61%)          |         |
| High                                  | 1110 (32%)      | 445 (47%)          | 475 (31%)          | 190 (21%)          |         |
| Practice of sports outside school     | 2619 (76%)      | 769 (81%)          | 1220 (79%)         | 603 (68%)          | <0.001  |
| Symptoms in the past 12 months        |                 |                    |                    |                    |         |
| Wheeze                                | 281 (8%)        | 75 (8%)            | 137 (9%)           | 69 (8%)            | 0.906   |
| Exercise-induced wheeze               | 274 (8%)        | 43 (5%)            | 134 (9%)           | 97 (11%)           | <0.001  |
| Night cough apart from colds          | 394 (12%)       | 142 (15%)          | 154 (10%)          | 98 (11%)           | <0.001  |
| Rhinitis apart from colds             | 1052 (31%)      | 218 (23%)          | 503 (33%)          | 331 (36%)          | <0.001  |
| Habitual snoring (almost every night) | 164 (5%)        | 56 (6%)            | 60 (4%)            | 48 (5%)            | 0.610   |
| Use of inhaled medication             |                 |                    |                    |                    |         |
| Short acting beta two agonists        | 257 (8%)        | 63 (7%)            | 123 (8%)           | 71 (8%)            | 0.437   |
| Inhaled corticosteroids               | 179 (5%)        | 36 (4%)            | 90 (6%)            | 53 (6%)            | 0.015   |
| Maternal smoking                      | 575 (17%)       | 122 (13%)          | 266 (17%)          | 187 (20%)          | <0.001  |
| Paternal smoking                      | 761 (22%)       | 173 (18%)          | 335 (22%)          | 253 (27%)          | <0.001  |
| Pets in the household                 | 1472 (43%)      | 313 (33%)          | 722 (47%)          | 437 (47%)          | <0.001  |
| Living in a farm                      | 85 (3%)         | 12 (1%)            | 46 (3%)            | 27 (3%)            | 0.001   |

Information obtained from the parental questionnaires at baseline. P trend: p value for a trend across ordered categories of age groups.

## Discussion

LUIS is a large school-based study performed 2013-2016 in the canton of Zurich, Switzerland which comprised a thorough assessment of respiratory symptoms, lung function, lifestyle and environmental exposures.

### Strengths and weaknesses

The main strength of LUIS is the wealth of health data that were collected, which includes three different lung function tests: spirometry, FeNO measured using high resolution equipment, and the novel DTG-SBW. This permits the investigation of different physiological aspects of lung health. A subsample of participants repeated lung function measurements a year later, which allows to assess lung growth. We collected detailed questionnaire data on respiratory symptoms, diagnoses and lifestyle both from parents and from children, which allows comparisons between their answers. Information was collected on lower respiratory symptoms like wheeze, and chronic cough and on upper respiratory symptoms such as rhinitis, hay fever and snoring. Respiratory symptoms are influenced by seasonality but the *LuftiBus* visited the schools throughout different seasons, which gives the possibility to take seasonality into account in our analysis. Participants' address histories, enable us to use state-of-the-art methods [29, 30] to estimate air pollution exposure during specific time windows.

The main weakness is that it was not a perfectly random sample of schoolchildren. Participation was decided by the heads of the schools, and classes were recruited as a whole. We do not have individual data on non-participating students, which limits the

possibilities to assess representativeness of the sampled population. However, the distribution of participating schools in rural and urban areas at baseline was similar to the average distribution of schools in the canton of Zurich. At follow-up, schools from small urban areas were slightly overrepresented in our study. The cost associated to the health promotion activity in which the LUIS study was embedded was covered by the public budget for health prevention activities available to school heads. The area-based socioeconomic index of participating families was roughly comparable to that of all households with school-aged children from the canton of Zurich. Thus, we think LUIS gives a fair picture of the school-aged population from the canton of Zurich. Another limitation is the lack of objective measurements of atopy such as skin prick tests or serum IgE levels. This limits the interpretation of FeNO data. We had however, proxy measures of atopy i.e. reported hay fever and atopic dermatitis.

## Outlook

LUIS will cover knowledge gaps on children's respiratory health. This dataset allows to determine prevalence of upper and lower respiratory symptoms, to describe lifestyle characteristics like physical activity and smoking [37], and to study associations with lung function. We are able to use information from both parents and children and several lung function tests including markers of ventilatory function (spirometry), ventilation inhomogeneity (DTG-SBW) and Th2 airway inflammation (FeNO), to answer research questions in a comprehensive way [32, 38]. For example, DTG-SBW data allows to detect even subtle changes in peripheral airways, that may not be identified by spirometry alone [38]. The broad set of data collected allows us to describe lung



function in healthy children, and to report normal values. The LUIS study makes it also possible to study effects of air pollution on respiratory symptoms and lung function.

In conclusion, *LuftiBus in the school* (LUIS) provides a unique opportunity to assess the respiratory health in Swiss schoolchildren, and its association with health behaviours and air pollution. Better understanding of factors that influence Swiss schoolchildren's respiratory health may help to establish new recommendations and influence policy makers' decisions.

### The LuftiBus in the school study group

The study PIs Prof. Alexander Moeller, Prof. Claudia Kuehni, and Prof. Philipp Latzin conceptualised and designed the study. Alexander Moeller supervised data collection and was responsible for the overall conduct of the study. Philipp Latzin was responsible for the lung function measurements. Claudia Kuehni was responsible for the questionnaire design and data analysis. Rebeca Mozun was responsible for data management and coordination. Florian Singer and Johanna Kurz are responsible for management and analysis of DTG-SBW data. Myrofora Goutaki, Eva S.L. Pedersen, and Cristina Ardura-Garcia (Institute of Social and Preventive Medicine, University of Bern, Switzerland), support statistical analysis. Jakob Usemann, Martin Röösl (Swiss Tropical and Public Health Institute, Basel, Switzerland), and Kees de Hoogh are responsible the air pollution data.

### Funding

*Lunge Zürich*, Switzerland, funded the study set-up, development and data collection with a grant to Alexander Moeller. *Lunge Zürich*, Switzerland, and University Children's Hospital Zurich and Children's Research Center, University of Zurich, Switzerland, funds LUIS data management, data analysis and publications. Analysis has been supported by a grant of the Swiss National Science Foundation (320030\_173044) to Claudia Kuehni and an *Ambizione* grant of the Swiss National Science Foundation to Myrofora Goutaki (P200P3\_185923). Further analyses are funded by a grant of *Lungenliga Bern*, Switzerland, to Florian Singer and a grant of *Lungenliga Schweiz* to Jakob Usemann.

## Acknowledgements

We thank the school teams and the families for participating in the study. We thank the field workers and study personnel for conducting the study. We thank Andras Soti, Marc-Alexander Oestreich, Corin Willers (Paediatric Respiratory Medicine, Children's University Hospital of Bern, University of Bern, Switzerland), Léonie Hüsler, Eugénie Collaud, and Carmen C. M. de Jong (Institute of Social and Preventive Medicine, University of Bern, Switzerland) for their help in the assessment of the quality of the spirometry flow-volume curves. We thank Claudia Berlin and the Swiss National Cohort (SNC) ([www.swissnationalcohort.ch](http://www.swissnationalcohort.ch)) for providing data on the Swiss-SEP for the canton of Zurich. We thank the Swiss federal statistical office for providing data on schools and urbanisation degree of municipalities in the canton of Zurich.

## Authors contributions

Alexander Moeller, Claudia E. Kuehni, and Philipp Latzin conceptualised and designed the study. Rebeca Mozun analysed the data and drafted the manuscript. Eva S.L. Pedersen supported the statistical analysis. All authors gave input for interpretation of the data. All authors critically revised and approved the manuscript.

## References

1. Ferrante G, La Grutta S. The Burden of Pediatric Asthma. *Frontiers in pediatrics* 2018; 6: 186.
2. Lau S, Nickel R, Niggemann B, Gruber C, Sommerfeld C, Illi S, Kulig M, Forster J, Wahn U, Groeger M, Zepp F, Kamin W, Bieber I, Tacke U, Wahn V, Bauer CP, Bergmann R, von Mutius E. The development of childhood asthma: lessons from the German Multicentre Allergy Study (MAS). *Paediatric respiratory reviews* 2002; 3(3): 265-272.
3. Asher MI, Keil U, Anderson HR, Beasley R, Crane J, Martinez F, Mitchell EA, Pearce N, Sibbald B, Stewart AW, et al. International Study of Asthma and Allergies in Childhood (ISAAC): rationale and methods. *Eur Respir J* 1995; 8(3): 483-491.
4. Pearce N, Ait-Khaled N, Beasley R, Mallol J, Keil U, Mitchell E, Robertson C. Worldwide trends in the prevalence of asthma symptoms: phase III of the International Study of Asthma and Allergies in Childhood (ISAAC). *Thorax* 2007; 62(9): 758-766.
5. Selby A, Munro A, Grimshaw KE, Cornelius V, Keil T, Grabenhenrich L, Clausen M, Dubakiene R, Fiocchi A, Kowalski ML, Papadopoulos NG, Reche M, Sigurdardottir ST, Sprickelman AB, Xepapadaki P, Mills ENC, Beyer K, Roberts G. Prevalence estimates and risk factors for early childhood wheeze across Europe: the EuroPrevall birth cohort. *Thorax* 2018; 73(11): 1049-1061.
6. Sennhauser FH, Kuhni CE. Prevalence of respiratory symptoms in Swiss children: is bronchial asthma really more prevalent in boys? *Pediatr Pulmonol* 1995; 19(3): 161-166.
7. Alfvén T, Braun-Fahrlander C, Brunekreef B, von Mutius E, Riedler J, Scheynius A, van Hage M, Wickman M, Benz MR, Budde J, Michels KB, Schram D, Ublagger E, Waser M, Pershagen G, group Ps. Allergic diseases and atopic sensitization in children related to farming and anthroposophic lifestyle--the PARSIFAL study. *Allergy* 2006; 61(4): 414-421.
8. Frei R, Roduit C, Bieli C, Loeliger S, Waser M, Scheynius A, van Hage M, Pershagen G, Doekes G, Riedler J, von Mutius E, Sennhauser F, Akdis CA, Braun-Fahrlander C, Lauener RP. Expression of genes related to anti-inflammatory pathways are modified among farmers' children. *PLoS one* 2014; 9(3): e91097.
9. Riedler J, Braun-Fahrlander C, Eder W, Schreuer M, Waser M, Maisch S, Carr D, Schierl R, Nowak D, von Mutius E. Exposure to farming in early life and development of asthma and allergy: a cross-sectional survey. *Lancet (London, England)* 2001; 358(9288): 1129-1133.
10. Illi S, Depner M, Genuneit J, Horak E, Loss G, Strunz-Lehner C, Buchele G, Boznanski A, Danielewicz H, Cullinan P, Heederik D, Braun-Fahrlander C, von Mutius E. Protection from childhood asthma and allergy in Alpine farm environments--the GABRIEL Advanced Studies. *The Journal of allergy and clinical immunology* 2012; 129(6): 1470-1477.e1476.
11. Braun-Fahrlander C, Gassner M, Grize L, Takken-Sahli K, Neu U, Stricker T, Varonier HS, Wuthrich B, Sennhauser FH, Swiss Study on Childhood A, Respiratory s, Air Pollution t. No further increase in asthma, hay fever and atopic sensitisation in adolescents living in Switzerland. *Eur Respir J* 2004; 23(3): 407-413.
12. Grize L, Gassner M, Wuthrich B, Bringolf-Isler B, Takken-Sahli K, Sennhauser FH, Stricker T, Eigenmann PA, Braun-Fahrlander C, Swiss Surveillance Programme on Childhood A, Respiratory symptoms with respect to Air Pollution t. Trends in

- prevalence of asthma, allergic rhinitis and atopic dermatitis in 5-7-year old Swiss children from 1992 to 2001. *Allergy* 2006; 61(5): 556-562.
13. Federal Statistical Office. [cited 2020 05 May; Available from: <https://www.bfs.admin.ch/bfs/en/home/fso/swiss-federal-statistical-office.html>
  14. Lunge Zürich. [cited 2020 02 June]; Available from: <https://www.lunge-zuerich.ch/de/projekte/luftibus/info-luftibus/?oid=1116&lang=de>
  15. Rochat MK, Laubender RP, Kuster D, Braendli O, Moeller A, Mansmann U, von Mutius E, Wildhaber J. Spirometry reference equations for central European populations from school age to old age. *PLoS one* 2013; 8(1): e52619-e52619.
  16. West EA, Strassmann A, Wang C, Turk A, de Hoogh K, Rööslı M, Bopp M, Buist AS, Dressel H, Puhan MA. Increase in Airway Obstruction between 1993 and 2012 in Switzerland. An Observational Study. *Annals of the American Thoracic Society* 2020; 17(4): 457-465.
  17. Kuehni CE, Brooke AM, Strippoli MP, Spycher BD, Davis A, Silverman M. Cohort profile: the Leicester respiratory cohorts. *Int J Epidemiol* 2007; 36(5): 977-985.
  18. Harris PA, Taylor R, Minor BL, Elliott V, Fernandez M, O'Neal L, McLeod L, Delacqua G, Delacqua F, Kirby J, Duda SN, Consortium RE. The REDCap consortium: Building an international community of software platform partners. *J Biomed Inform* 2019; 95: 103208.
  19. Bopp M, Spoerri A, Zwahlen M, Gutzwiller F, Paccaud F, Braun-Fahrlander C, Rougemont A, Egger M. Cohort Profile: the Swiss National Cohort--a longitudinal study of 6.8 million people. *Int J Epidemiol* 2009; 38(2): 379-384.
  20. Panczak R, Galobardes B, Voorpostel M, Spoerri A, Zwahlen M, Egger M. A Swiss neighbourhood index of socioeconomic position: development and association with mortality. *Journal of epidemiology and community health* 2012; 66(12): 1129-1136.
  21. Singer F, Stern G, Thamrin C, Fuchs O, Riedel T, Gustafsson P, Frey U, Latzin P. Tidal volume single breath washout of two tracer gases--a practical and promising lung function test. *PLoS one* 2011; 6(3): e17588.
  22. Robinson PD, Latzin P, Verbanck S, Hall GL, Horsley A, Gappa M, Thamrin C, Arets HG, Aurora P, Fuchs SI, King GG, Lum S, Macleod K, Paiva M, Pillow JJ, Ranganathan S, Ratjen F, Singer F, Sonnappa S, Stocks J, Subbarao P, Thompson BR, Gustafsson PM. Consensus statement for inert gas washout measurement using multiple- and single- breath tests. *Eur Respir J* 2013; 41(3): 507-522.
  23. Singer F, Stern G, Thamrin C, Abbas C, Casaulta C, Frey U, Latzin P. A new double-tracer gas single-breath washout to assess early cystic fibrosis lung disease. *Eur Respir J* 2013; 41(2): 339-345.
  24. Aurora P, Kozłowska W, Stocks J. Gas mixing efficiency from birth to adulthood measured by multiple-breath washout. *Respir Physiol Neurobiol* 2005; 148(1-2): 125-139.
  25. Van Muylem A, Paiva M, Baran D, Yernault JC. Structural change of the acinus during growth assessed by single-breath tracer gas washouts. *Pediatr Pulmonol* 1996; 22(4): 230-235.
  26. Araya-Cloutier C, Vincken J, Van De Schans M, Hageman J, Schaftenaar G, Den Besten H, al. e. ATS/ERS recommendations for standardized procedures for the online and offline measurement of exhaled lower respiratory nitric oxide and nasal nitric oxide, 2005. *Am J Respir Crit Care Med* 2005; 171(8): 912-930.

27. Miller MR, Hankinson J, Brusasco V, Burgos F, Casaburi R, Coates A, Crapo R, Enright P, van der Grinten CP, Gustafsson P, Jensen R, Johnson DC, MacIntyre N, McKay R, Navajas D, Pedersen OF, Pellegrino R, Viegi G, Wanger J, Force AET. Standardisation of spirometry. *Eur Respir J* 2005; 26(2): 319-338.
28. Quanjer PH, Stanojevic S, Cole TJ, Baur X, Hall GL, Culver BH, Enright PL, Hankinson JL, Ip MS, Zheng J, Stocks J. Multi-ethnic reference values for spirometry for the 3-95-yr age range: the global lung function 2012 equations. *Eur Respir J* 2012; 40(6): 1324-1343.
29. de Hoogh K, Saucy A, Shtein A, Schwartz J, West EA, Strassmann A, Puhon M, Roosli M, Stafoggia M, Kloog I. Predicting Fine-Scale Daily NO<sub>2</sub> for 2005-2016 Incorporating OMI Satellite Data Across Switzerland. *Environ Sci Technol* 2019; 53(17): 10279-10287.
30. de Hoogh K, Heritier H, Stafoggia M, Kunzli N, Kloog I. Modelling daily PM<sub>2.5</sub> concentrations at high spatio-temporal resolution across Switzerland. *Environmental pollution (Barking, Essex : 1987)* 2018; 233: 1147-1154.
31. Braegger C, Jenni O, Konrad D, Molinari L. Neue Wachstumskurven für die Schweiz. *Paediatrica*. . *Paediatrica* 2011; Vol 22 n1.
32. Singer F, Luchsinger I, Inci D, Knauer N, Latzin P, Wildhaber JH, Moeller A. Exhaled nitric oxide in symptomatic children at preschool age predicts later asthma. *Allergy* 2013; 68(4): 531-538.
33. de Onis M, Onyango AW, Borghi E, Siyam A, Nishida C, Siekmann J. Development of a WHO growth reference for school-aged children and adolescents. *Bulletin of the World Health Organization* 2007; 85(9): 660-667.
34. von Elm E, Altman DG, Egger M, Pocock SJ, Gotsche PC, Vandenbroucke JP. The Strengthening the Reporting of Observational Studies in Epidemiology (STROBE) statement: guidelines for reporting observational studies. *Journal of clinical epidemiology* 2008; 61(4): 344-349.
35. Bundesamt für Statistik. Räumliche Typologien. [cited 2020 05 May]; Available from: <https://www.bfs.admin.ch/bfs/de/home/statistiken/querschnittsthemen/raeumliche-analysen/raeumliche-gliederungen/raeumliche-typologien.html>
36. EUROSTAT. Verstädterungsgrad (DEGURBA, Degree of Urbanisation). [cited 2020 05 May]; Available from: <http://ec.europa.eu/eurostat/de/web/degree-of-urbanisation/overview>
37. Mozun R, Arduro-Garcia C, de Jong CCM, Goutaki M, Usemann J, Singer F, Latzin P, Kuehni CE, Moeller A. Cigarette, shisha, and electronic smoking and respiratory symptoms in Swiss children: The LUIS study. *Pediatr Pulmonol* 2020.
38. Singer F, Abbas C, Yammine S, Casaulta C, Frey U, Latzin P. Abnormal small airways function in children with mild asthma. *Chest* 2014; 145(3): 492-499.

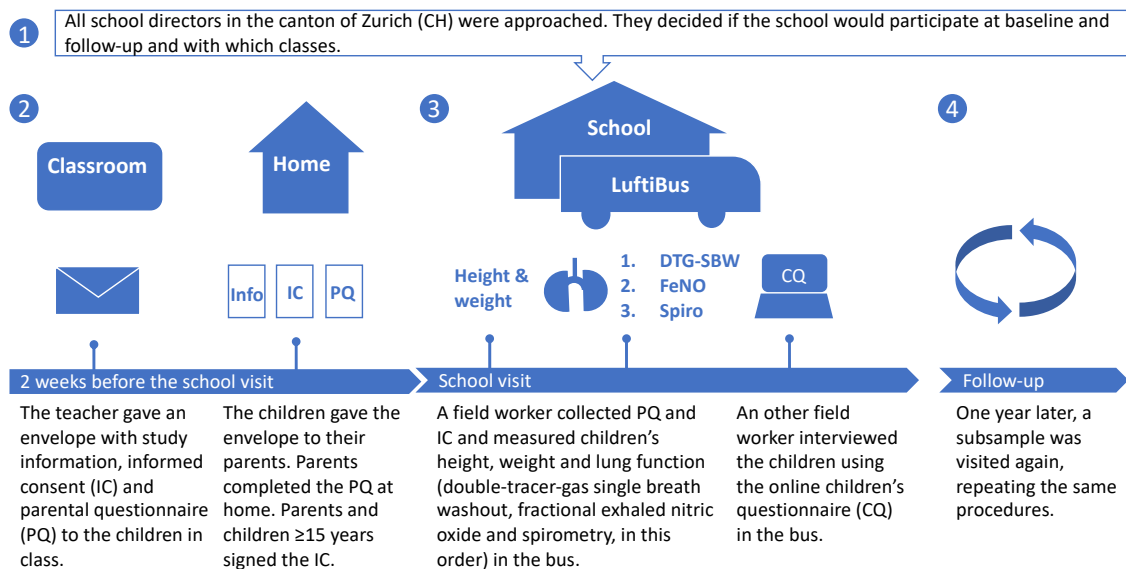

**Figure 1:** Design of the *LuftiBus in the school* (LUIS) study.

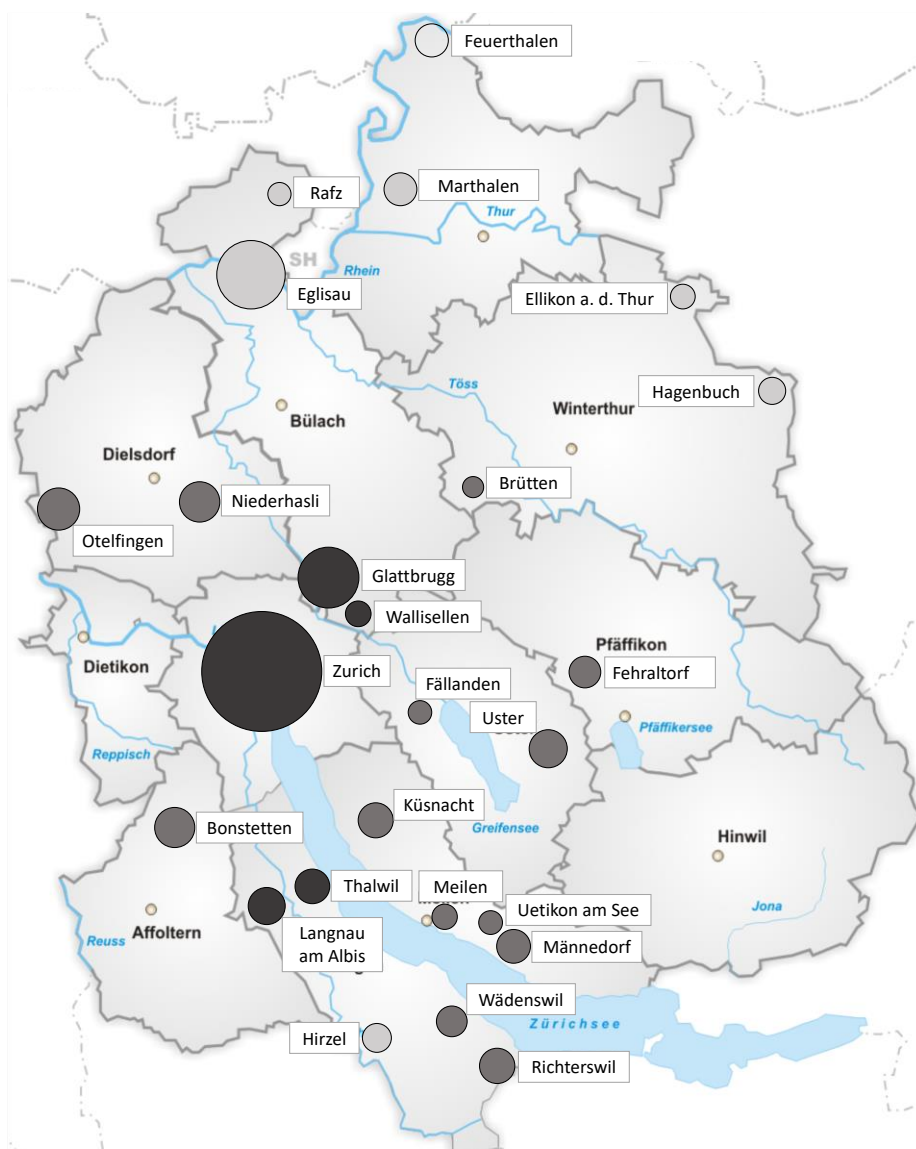

**Figure 2:** Areas from the canton of Zurich that were visited by the *LuftiBus in the school* (LUIS) study. The area of the circle is proportional to the number of participants per location. The colour of the circle indicates the degree of urbanization of the region (from darker to lighter grey: large urban, small urban, rural areas) according to the Swiss federal office of statistics classification.

Definition of urbanization degree: Cities or large urban area: At least 50% lives in high-density clusters. Towns and suburbs or small urban area: Less than 50% of the population lives in rural grid cells and less than 50% lives in a high-density cluster. Rural area: More than 50% of the population lives in rural grid cells.



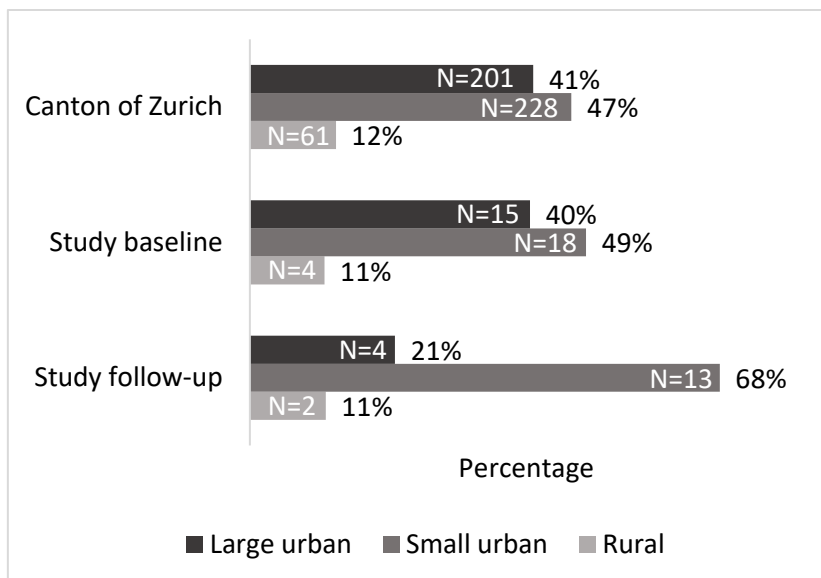

**Figure 3:** Proportion of schools by degree of urbanisation in the canton of Zurich and in the *LuftiBus in the school* (LUIS) study at baseline and follow-up.

Definition of urbanization degree: Cities or large urban area: At least 50% lives in high-density clusters. Towns and suburbs or small urban area: Less than 50% of the population lives in rural grid cells and less than 50% lives in a high-density cluster. Rural area: More than 50% of the population lives in rural grid cells.

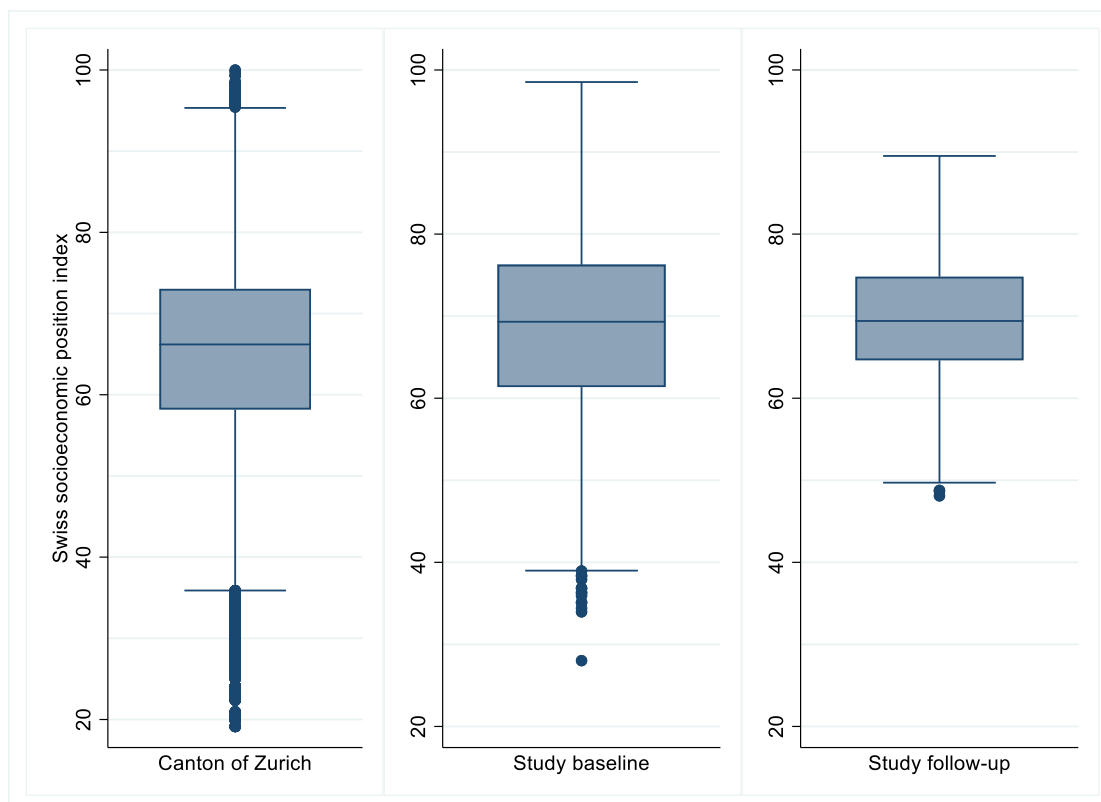

**Figure 4:** Box plots showing the distribution of Swiss socioeconomic position index (Swiss-SEP) for families with at least one child aged 6-17 years and living in the canton of Zurich and in the *LuftiBus in the school* (LUIS) study at baseline and follow-up.

The median is represented by a horizontal line inside the box, 25 and 75 percentiles by the upper and lower box horizontal lines of the box, minimum and maximum values are shown as whiskers, and points outside the whiskers are outliers.
