# Supplementary material for: LuftiBus in the school (LUIS): a population-based study on respiratory health in schoolchildren
Source: bioRxiv or medRxiv preprint supplement (doi:10.1101/2020.10.14.20212076), 2020-12-14
Supplement: Supplementary file [file media-1.pdf]

# LuftiBus in the school (LUIS): a population-based study on respiratory health in schoolchildren.

## Supplementary online material

### Table of contents:

|                                                                                                                                                                                                                                                                                        |    |
|----------------------------------------------------------------------------------------------------------------------------------------------------------------------------------------------------------------------------------------------------------------------------------------|----|
| Additional methods.....                                                                                                                                                                                                                                                                | 2  |
| Table S1: Characteristics of schools in the canton of Zurich and visited by the LuftiBus in the school study (LUIS) at baseline and one-year follow-up by degree of urbanization.....                                                                                                  | 8  |
| Table S2: Number of participants in the LuftiBus in the school (LUIS) study with available information on parental questionnaires (PQ), children's questionnaires (CQ), spirometry (Spiro), and fractional exhaled nitric oxide (FeNO) at baseline and one-year follow-up.....         | 9  |
| Figure S1: Poster of asthma medications used in the LuftiBus in the school (LUIS) study to help children answer which medication they had taken the day of the visit (in German).....                                                                                                  | 10 |
| Figure S2: Histograms showing the distribution of the Swiss socioeconomic position index for families from the canton of Zurich with at least one child aged 6-17 years living in the household and in the LuftiBus in the school (LUIS) study at baseline and one year follow-up..... | 11 |
| Figure S3: Fit lines of double tracer gas single breath washout (DTG-SBW), differences in molar mass (MM) plotted against expired volume.....                                                                                                                                          | 12 |

Rebeca Mozun\*<sup>1,2</sup>, Claudia E. Kuehni\*<sup>1,3</sup>, Eva S. L. Pedersen<sup>1</sup>, Myrofora Goutaki<sup>1,3</sup>, Johanna M. Kurz<sup>3</sup>, Kees de Hoogh<sup>4,5</sup>, Jakob Usemann<sup>6,7</sup>, Florian Singer<sup>3,8</sup>, Philipp Latzin<sup>#3</sup>, Alexander Moeller<sup>#6</sup>

\*These authors contributed equally to the work

#These authors contributed equally to the work

<sup>1</sup>Institute of Social and Preventive Medicine, University of Bern, Switzerland

<sup>2</sup>Graduate School for Cellular and Biomedical Sciences, University of Bern, Switzerland

<sup>3</sup>Paediatric Respiratory Medicine, Children's University Hospital of Bern, University of Bern, Switzerland

<sup>4</sup>Swiss Tropical and Public Health Institute, Basel, Switzerland

<sup>5</sup>University of Basel, Basel, Switzerland

<sup>6</sup>Division of Respiratory Medicine, University Children's Hospital Zurich and Children's Research Center, University of Zurich, Switzerland

<sup>7</sup>University Children's Hospital Basel (UKBB), Basel, Switzerland

<sup>8</sup>PEDNET, paediatric clinical trial unit, Children's University Hospital of Bern, University of Bern, Switzerland

## Additional methods

LuftiBus in the school (LUIS) is a study funded by *Lunge Zürich*, a non-profit organization that promotes respiratory health prevention and research. LUIS used a special bus (“LuftiBus”) to visit schools within the canton of Zurich. Inclusion criteria were consent to participate and age 6 to 17 years. There were no predefined exclusion criteria.

## LuftiBus

LuftiBus is a broader project of *Lunge Zürich* for the prevention and early detection of lung diseases and has been ongoing for 30 years [1, 2]. LuftiBus offers lung function tests to adults of the general public living in the metropolitan region of Zurich at a non-profit cost of 10 CHF [3]. Previous research has used data from the LuftiBus lung function campaign to calculate reference equations for lung function [3, 4]. LuftiBus data was linked with data from the Swiss National Cohort [5] to assess time trends in the prevalence of airway obstruction among adults from the general population [6], occupational risk factors for airway obstruction [7], and spatial risk pattern of respiratory morbidity [8].

## Data collection: double tracer gas single breath washout (DTG-SBW)

The gas mixture had the same molar mass (MM, g.mol<sup>-1</sup>) as medical-grade air, such that any detectable changes compared with normally expired molar mass can be attributed to relative changes in helium (He) and sulphur hexafluoride (SF<sub>6</sub>) concentrations [9]. MM was measured by a side-stream ultrasonic flowmeter, tidal flows by a main-stream ultrasonic flowmeter. On each test day, signal calibration and

verification were performed prior to testing. The main-stream ultrasonic flowmeter was calibrated using a 1 L precision syringe. The side-stream ultrasonic flowmeter and the oxygen (O<sub>2</sub>) and carbon dioxide (CO<sub>2</sub>) sensors were calibrated using medical-grade calibration gas and pure O<sub>2</sub> (Carbagas, Bern, Switzerland).

### Air pollution assessments

Individual air pollution exposure will be estimated for nitrogen dioxide (NO<sub>2</sub>) and for particulate matter with an aerodynamic diameter of 2.5µm or less (PM<sub>2.5</sub>) using air pollution models developed by de Hoogh et. al [10, 11]. Daily average NO<sub>2</sub> concentrations from 2005 to 2016 were modelled in a multistage framework with mixed-effect and random forest models at a fine spatial resolution (100x100 m) [10]. The model incorporates spatial and temporal predictors including satellite-derived data from the Ozone Monitoring Instrument and Copernicus Atmosphere Monitoring Service, and road, land use, topography and meteorological information. Daily NO<sub>2</sub> monitoring data were obtained from the Immissionsdatabank Luft (IDB Luft, FOEN, Bern, Switzerland) measured at 67 sites in 2005 and increased to 110 sites in 2016. The model was able to explain approximately 73% of the overall spatiotemporal variation in NO<sub>2</sub> measurements [10].

Spatiotemporal resolved models were developed to predict daily PM<sub>2.5</sub> exposure [11]. First, daily PM<sub>2.5</sub> concentrations were estimated by a combination of a mixed effect model and a generalized additive mixed model at a 1x1km resolution across Switzerland using Multiangle Implementation of Atmospheric Correction (MAIAC) spectral aerosol optical depth (AOD) data. Second, support vector machine algorithms

were used to predict precise exposure estimates at a 100 x 100m resolution in using spatiotemporal predictor data. The global (1 km) and local (100 m) models explain on average 73% of the total, 71% of the spatial and 75% of the temporal variation globally, and on average 89% of the total, 95% of the spatial and 88% of the temporal variation locally in measured PM<sub>2.5</sub> concentrations [11]. From these data we will calculate the mean exposure of each subject to specified air pollution during specific exposure windows.

Other available data on air pollution include ozone in parts per billion, fine particles (number of particles per cm<sup>3</sup>, average particle diameter in nm, lung-deposited particle surface in  $\mu\text{m}^2/\text{cm}^3$ ), and temperature and humidity measurements obtained at schools on the day of the study visit using a wireless collection system installed on the roof of the bus in collaboration with the OpenSense team of the ETH (Swiss Federal Institute of Technology in Zurich). The system sent data continuously to a central database at the ETH and sensors were calibrated when the bus passed a reference station.

#### Data quality

##### *Parental questionnaires*

The data entry form of the parental questionnaire contained automatic plausibility checks to reduce data entry errors. We did double data entry for a random 10% of the parental questionnaires using the software Epidata. Variables had one to five entry fields. We found a low field error percentage (1%) and thus did not double enter the remaining 90% of questionnaires.

### *DTG-SBW*

Quality control of DTG-SBW measurements was performed by the field workers on site. A double check of DTG-SBW test results is on-going, to see if the phase III was linear and constituted at least 50% of expired volume [9, 12]. Quality control criteria for DTG-SBW were defined as: 1) no evidence of air leaks as monitored by volume and MM signals, 2) similar flow-volume-loops in pre-test and test breaths, 3) breath volumes of the five tidal pre-test and the test breaths were within 10%, 4) inspiratory peak flow within the by-pass flow.

For signal processing and analyses we used software developed by our group (LungSim, Numerical Modeling, Thalwil, Switzerland) running in (Matlab® R2014a, The Mathworks Inc., Natick, MA, USA) [9]. MM, CO<sub>2</sub> and volume signals were aligned in time accounting for different signal rise times [9]. To extract the double-tracer gas signal from MM we subtracted the naturally exhaled CO<sub>2</sub> fraction from the MM signal [9]. The corrected MM and CO<sub>2</sub> expirograms were plotted against expired volume (Figure S3). The SDTG was computed automatically by linear regression between 65 to 95% of expired volume and under visual control. If required, we manually adjusted volume limits to exclude adjacent tidal phases. Quality criteria were presence of both MM and CO<sub>2</sub> phase III over at least 50% of expired volume.

### *Fractional exhaled nitric oxide (FeNO)*

Required average flow in the plateau was 40-60 ml/s and required duration of exhalation was at least 4 seconds for children younger than 12 years and 6 seconds for children aged 12 years or older. Mean FeNO was calculated using at least two

reproducible exhalations with the nitric oxide plateau values within 10% of each other.

Field workers checked the quality of the FeNO measurements on site according to ATS/ERS criteria for online FeNO measurement in children [13].

### *Spirometry flow-volume curves*

In a dedicated workshop, a paediatric pulmonologist and lung function expert (FS) explained the fundamental concepts of paediatric spirometry quality control to all participants. Five pairs of team members assessed and scored by consensus the quality of spirometry curves into “good”, “moderate” or “bad” quality” depending on the presence of hesitation at start of expiration, submaximal effort, forced flow deviations (e.g. cough or glottis closure) within or after the first second, and premature ending of the exhalation within or after the first second. Three paediatric respiratory physicians (FS, CK, JU) assessed all spirometry curves marked as “moderate” or “bad” quality during the first screening and set their own score. If the paediatric respiratory physicians had doubts on the scoring of a spirometry curve, they discussed the curve among them and reached an agreement.

## References:

1. Lunge Zürich. [cited 2020 02 June]; Available from: <https://www.lunge-zuerich.ch/de/projekte/luftibus/info-luftibus/?oid=1116&lang=de>
2. Egger S, Wieland R, Ludin M, Brändli O, Vetter W, Suter PM. [Overweight and obesity in the Zurich canton. A LuftiBus study]. *Praxis* 2001; 90(13): 531-538.
3. Kuster SP, Kuster D, Schindler C, Rochat MK, Braun J, Held L, Brändli O. Reference equations for lung function screening of healthy never-smoking adults aged 18-80 years. *Eur Respir J* 2008; 31(4): 860-868.
4. Rochat MK, Laubender RP, Kuster D, Braendli O, Moeller A, Mansmann U, von Mutius E, Wildhaber J. Spirometry reference equations for central European populations from school age to old age. *PLoS one* 2013; 8(1): e52619-e52619.
5. Bopp M, Spoerri A, Zwahlen M, Gutzwiller F, Paccaud F, Braun-Fahrländer C, Rougemont A, Egger M. Cohort Profile: the Swiss National Cohort--a longitudinal study of 6.8 million people. *Int J Epidemiol* 2009; 38(2): 379-384.
6. West EA, Strassmann A, Wang C, Turk A, de Hoogh K, Rösli M, Bopp M, Buist AS, Dressel H, Puhán MA. Increase in Airway Obstruction between 1993 and 2012 in Switzerland. An Observational Study. *Annals of the American Thoracic Society* 2020; 17(4): 457-465.
7. Strassmann A, Kaufmann M, Dressel H, Turk A, Rösli M, de Hoogh K, Sadhra SS, Bopp M, Puhán MA. Occupational exposure and the risk of airway obstruction and mortality. *International journal of public health* 2020.
8. Wang C, Puhán MA, Furrer R. Generalized spatial fusion model framework for joint analysis of point and areal data. *Spatial Statistics* 2018; 23: 72-90.
9. Singer F, Stern G, Thamrin C, Fuchs O, Riedel T, Gustafsson P, Frey U, Latzin P. Tidal volume single breath washout of two tracer gases--a practical and promising lung function test. *PLoS one* 2011; 6(3): e17588.
10. de Hoogh K, Saucy A, Shtein A, Schwartz J, West EA, Strassmann A, Puhán M, Roosli M, Stafoggia M, Kloog I. Predicting Fine-Scale Daily NO<sub>2</sub> for 2005-2016 Incorporating OMI Satellite Data Across Switzerland. *Environ Sci Technol* 2019; 53(17): 10279-10287.
11. de Hoogh K, Heritier H, Stafoggia M, Kunzli N, Kloog I. Modelling daily PM<sub>2.5</sub> concentrations at high spatio-temporal resolution across Switzerland. *Environmental pollution (Barking, Essex : 1987)* 2018; 233: 1147-1154.
12. Singer F, Stern G, Thamrin C, Abbas C, Casaulta C, Frey U, Latzin P. A new double-tracer gas single-breath washout to assess early cystic fibrosis lung disease. *Eur Respir J* 2013; 41(2): 339-345.
13. Araya-Cloutier C, Vincken J, Van De Schans M, Hageman J, Schaftenaar G, Den Besten H, al. e. ATS/ERS recommendations for standardized procedures for the online and offline measurement of exhaled lower respiratory nitric oxide and nasal nitric oxide, 2005. *Am J Respir Crit Care Med* 2005; 171(8): 912-930.
14. EUROSTAT. Verstädterungsgrad (DEGURBA, Degree of Urbanisation). [cited 2020 05 May]; Available from: <http://ec.europa.eu/eurostat/de/web/degree-of-urbanisation/overview>

**Table S1:** Characteristics of schools in the canton of Zurich and visited by the *LuftiBus* in the school study (LUIS) at baseline and at one-year follow-up, by degree of urbanisation.

|                                           | Urbanisation degree |             |          | Total  |
|-------------------------------------------|---------------------|-------------|----------|--------|
|                                           | Large urban         | Small urban | Rural    |        |
| <b>Schools in canton of Zurich</b>        |                     |             |          |        |
| Number of schools: n (%)                  | 201 (41)            | 228 (47)    | 61 (12)  | 490    |
| Number of classes: n (%)                  | 2450 (45)           | 2602 (48)   | 381 (7)  | 5433   |
| Number of students: n (%)                 | 48718 (45)          | 51588 (48)  | 7333 (7) | 107639 |
| Average number of students per class      | 19.9                | 19.8        | 19.2     | 19.8   |
| <b>Schools visited by LUIS, baseline</b>  |                     |             |          |        |
| Number of schools: n (%)                  | 15 (40)             | 18 (49)     | 4 (11)   | 37     |
| Number of classes: n (%)                  | 149 (39)            | 204 (54)    | 26 (7)   | 379    |
| Number of students: n (%)                 | 2959 (40)           | 3842 (53)   | 536 (7)  | 7337   |
| Average number of students per class      | 19.9                | 18.8        | 20.6     | 19.4   |
| <b>Schools visited by LUIS, follow-up</b> |                     |             |          |        |
| Number of schools: n (%)                  | 4 (21)              | 13 (68)     | 2 (11)   | 19     |
| Number of classes: n (%)                  | 45 (23)             | 143 (73)    | 7 (4)    | 195    |
| Number of students: n (%)                 | 917 (24)            | 2679 (72)   | 143 (4)  | 3739   |
| Average number of students per class      | 20.4                | 18.7        | 20.4     | 19.2   |

Calculations are based on aggregated data provided by the Swiss federal statistical office. The number of schools in the canton of Zurich corresponds to the year 2013. Definition of urbanization degree [14]: Large urban area: At least 50% lives in high-density clusters. Small urban area: Less than 50% of the population lives in rural grid cells and less than 50% lives in a high-density cluster. Rural area: More than 50% of the population lives in rural grid cells.



**Table S2:** Number of participants in the LuftiBus in the school (LUIs) study with available information on parental questionnaires (PQ), children’s questionnaires (CQ), spirometry (Spiro), and fractional exhaled nitric oxide (FeNO) at baseline and at the one-year follow-up.

| Available data                   | Baseline        | Follow-up      |
|----------------------------------|-----------------|----------------|
|                                  | N=3870<br>n (%) | N=655<br>n (%) |
| PQ                               | 3457 (89)       | 629 (96)       |
| CQ                               | 3546 (92)       | 640 (98)       |
| Spiro                            | 3446 (89)       | 614 (94)       |
| FeNO                             | 3393 (88)       | 588 (90)       |
| DTG-SBW                          | 1795 (46)       | 496 (76)       |
| PQ & CQ                          | 3171 (82)       | 614 (94)       |
| PQ & Spiro                       | 3071 (79)       | 589 (90)       |
| PQ & FeNO                        | 3030 (78)       | 565 (86)       |
| PQ & DTG-SBW                     | 1627 (42)       | 472 (72)       |
| CQ & Spiro                       | 3230 (83)       | 610 (93)       |
| CQ & FeNO                        | 3183 (82)       | 584 (89)       |
| CQ & DTG-SBW                     | 1784 (46)       | 492 (75)       |
| Spiro & FeNO                     | 3165 (82)       | 561 (86)       |
| Spiro & DTG-SBW                  | 1585 (41)       | 472 (72)       |
| FeNO & DTG-SBW                   | 1595 (41)       | 451 (69)       |
| CQ & Spiro & FeNO                | 2964 (77)       | 557 (85)       |
| CQ & Spiro & DTG-SBW             | 1579 (41)       | 469 (72)       |
| CQ & FeNO & DTG-SBW              | 1585 (41)       | 448 (68)       |
| PQ & Spiro & FeNO                | 2824 (73)       | 539 (82)       |
| PQ & Spiro & DTG-SBW             | 1429 (37)       | 449 (69)       |
| PQ & CQ & Spiro                  | 2882 (74)       | 585 (89)       |
| PQ & CQ & FeNO                   | 2845 (74)       | 561 (86)       |
| PQ & FeNO & DTG-SBW              | 1429 (37)       | 429 (65)       |
| Spiro & FeNO & DTG-SBW           | 1460 (38)       | 430 (66)       |
| PQ & CQ & Spiro & FeNO           | 2646 (68)       | 535 (82)       |
| PQ & CQ & FeNO & DTG-SBW         | 1421 (37)       | 426 (65)       |
| PQ & Spiro & FeNO & DTG-SBW      | 1305 (34)       | 409 (62)       |
| PQ & CQ & FeNO & DTG-SBW         | 1421 (37)       | 426 (65)       |
| CQ & Spiro & FeNO & DTG-SBW      | 1454 (38)       | 427 (65)       |
| PQ & CQ & Spiro & FeNO & DTG-SBW | 1300 (34)       | 406 (62)       |

Number of measurements before quality control.

# Asthma Medikamente

Diskus

Dosieraerosol

Dosieraerosol mit  
Vorschaltkammer

Turbuhaler

## Bronchien erweiternd: Beta-2-Sympathomimetikum

Ventolin  
(Salbutamol;  
kurzwirksames  
Beta-2-  
Sympathomim-  
etikum)

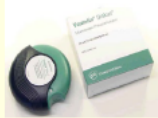

Ventolin (Salbutamol;  
kurzwirksames Beta-2-  
Sympathomimetikum)

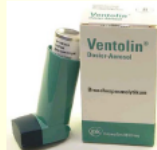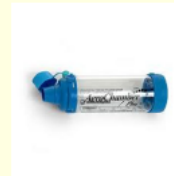

BRICANYL Turbuhaler  
(Terbutalin;  
kurzwirksames Beta-2-  
Sympathomimetikum)

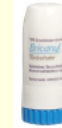

Serevent  
(Salmeterol;  
Langwirksames  
Beta-2-  
Sympathomim-  
etikum)

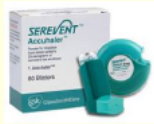

Serevent (Salmeterol;  
Langwirksames Beta-2-  
Sympathomimetikum)

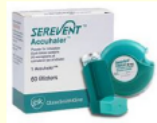

OXIS  
Turbuhaler( Formoterol;  
Langwirksames Beta-2-  
Sympathomimetikum)

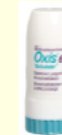

## Antientzündlich - Inhalative Kortikosteroide

Axotide  
(Fluticason;  
inhalatives  
Kortikosteroid)

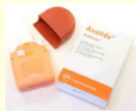

Axotide  
(Fluticason;  
inhalatives  
Kortikosteroid)

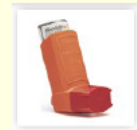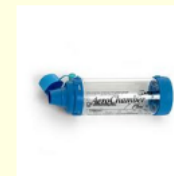

Symbicort (Formoterol  
und Budesonid; ;  
Kombination aus  
langwirksamen Beta-2-  
Sympathomimetikum und  
inhalativem  
Kortikosteroid)

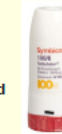

Pulmicort (Budesonid;  
inhalatives  
Kortikosteroid)

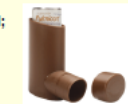

Pulmicort (Budesonid;  
inhalatives  
Kortikosteroid)

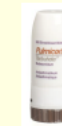

Seretide (Salmeterol  
und Fluticason;  
Kombination aus  
langwirksamen  
Beta-2-  
Sympathomimetiku-  
m und inhalativem  
Kortikosteroid)

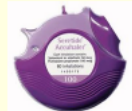

Seretide (Salmeterol und  
Fluticason; Kombination  
aus langwirksamen Beta-  
2-Sympathomimetikum  
und inhalativem  
Kortikosteroid)

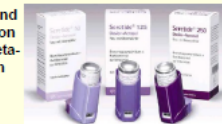

Leukotrienrezeptor-Antagonisten  
Singulair (Montelukast;  
Leukotrienrezeptor-Antagonist)

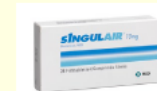

Figure S1: Poster of asthma medications used in the *LuftiBus in the school* (LUIS) study to help children answer which medication they had taken the day of the visit (in German).

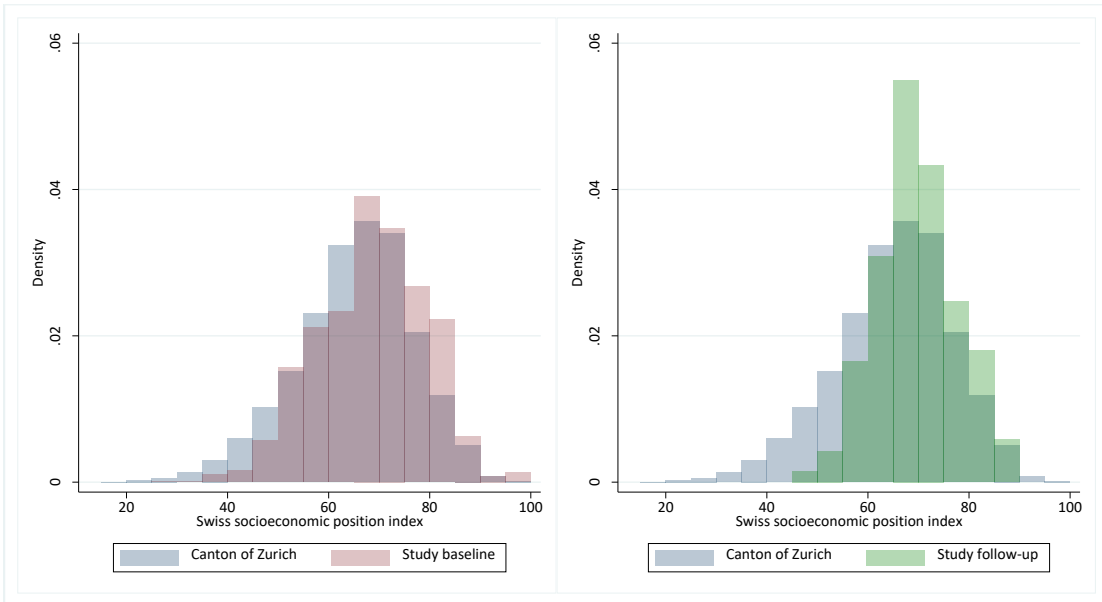

**Figure S2:** Histograms showing the distribution of the Swiss socioeconomic position index for families from the canton of Zurich with at least one child aged 6-17 years living in the household and in the *LuftiBus in the school* (LUIS) study at baseline and one-year follow-up.

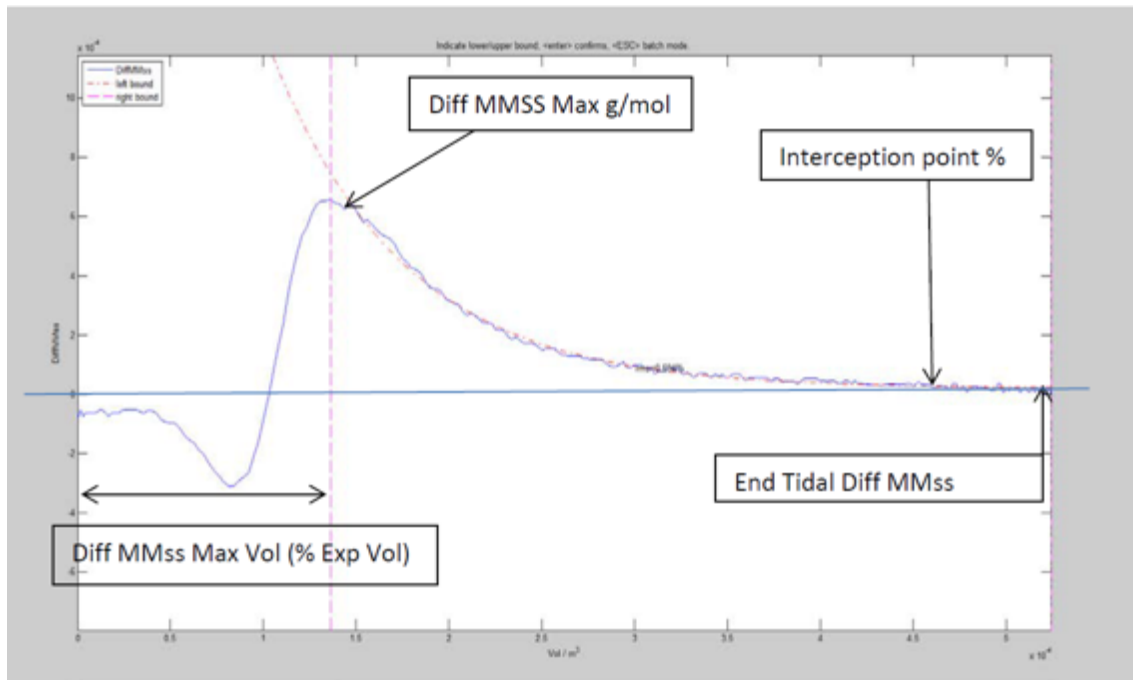

**Figure S3:** Fit lines of double tracer gas single breath washout (DTG-SBW), differences in molar mass (MM) plotted against expired volume.

Abbreviations: MMss = Molar mass signal of the side stream; MMss calc = Calculated molar mass signal of the side stream using measured gas proportion of a normal breath; Diff MMss = MMss – MMss calc; End Tidal Diff MMss: Difference of MMss – MMss calc (in %) at the end of expiration; Interception point (%): % of expired volume where Diff MMss = 0; Diff MMss Max Vol (% Exp Vol): Difference of MMss- MMss calc at the maximum expired volume; Left and right bound= 65-95% of expired volume.
